# Supplementary material
Source: Springer Nature journal article supplement (https://www.springermedizin.de/resource/supplementary/12970_2007_58_MOESM3_ESM.pdf/9594268)

# Perceived Stress Levels (1-10)

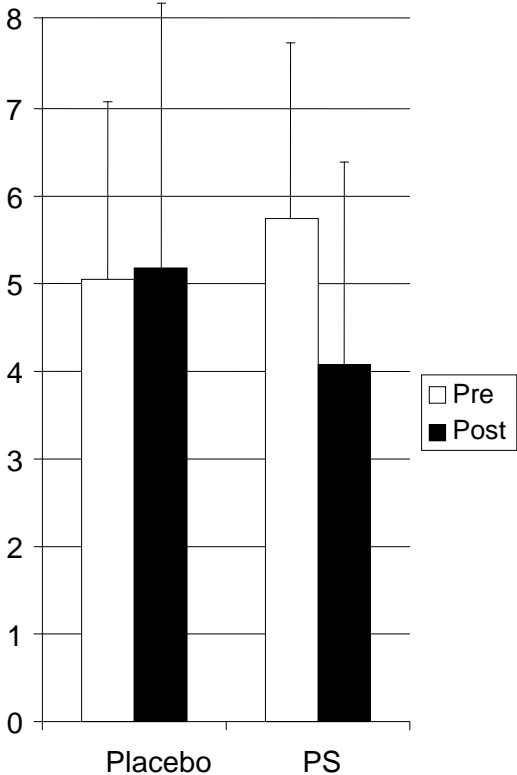

Supplement: MOESM3 [file 9594268]
